# Supplementary material for: MicroRNA expression in serum samples of sulfur mustard veterans as a diagnostic gateway to improve care
Source: PubMed Central journal article supplement (PMC5864010; doi:10.1371/journal.pone.0194530), 2018-03-22

## **S2 Fig. Comparative scatter plots of conditions.**

The panel shows ten distribution plots for the mild versus normal situation and ten for the severe versus normal situation, each for one of the comparisons: raw (filtered) vs. quantile normalization, raw vs. rank invariant scaling, raw vs. rank invariant normalization, raw vs. deltaCt normalization, raw vs. geometric mean normalization, raw vs. IPC normalization and the last four panels for the sample specific perspective.

'p1' indicates, that only panel 1 of the Exiqon set is presented.

Every set of plots shows the situation either for the mild or the severe group (i/e) versus the normal group (n).

The x and y axis denotes relative expression strength (decreasing from left to right, bottom to top).

**p1 – raw vs. quantile normalization**

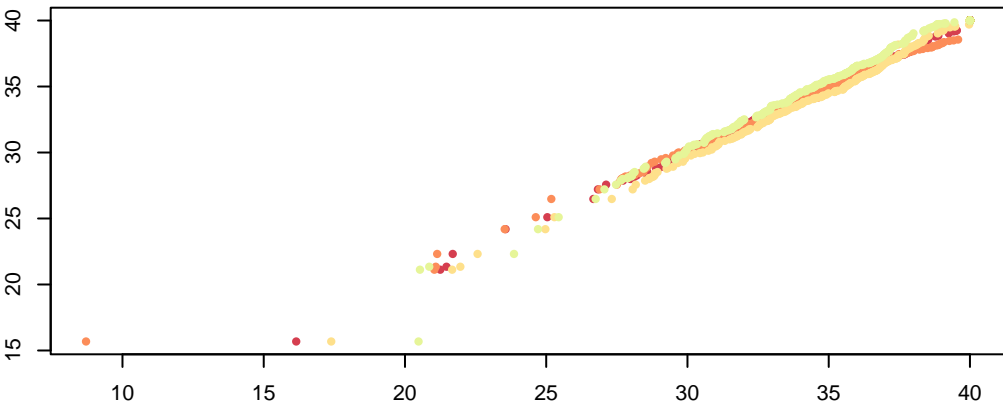

**p1 – raw vs. rank invariant scaling**

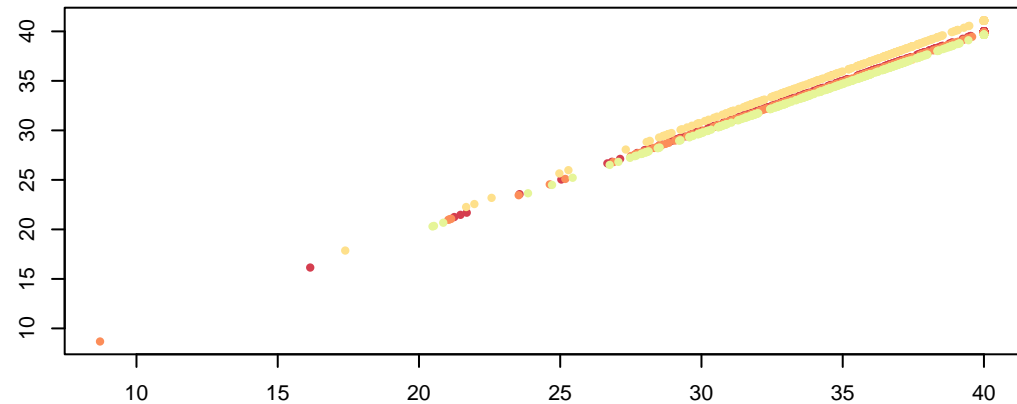

**p1 – raw vs. rank invariant normalization**

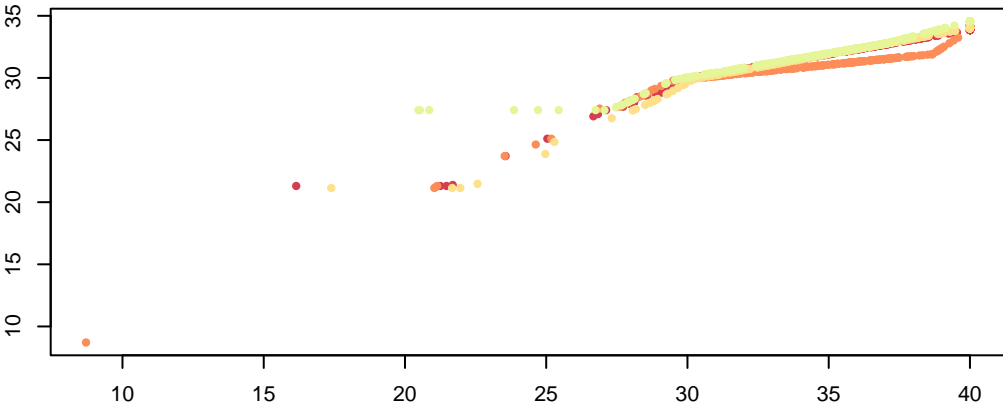

**p1 – raw vs. deltaCt normalization**

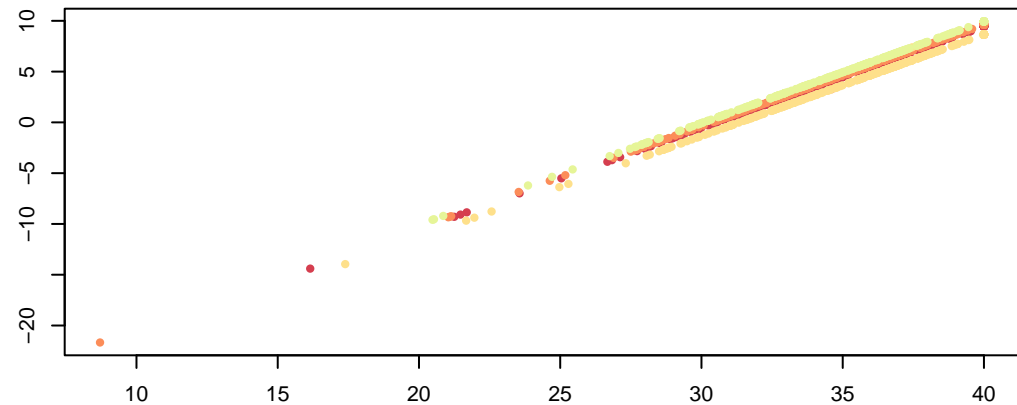

**p1 – raw vs. geometric mean normalization**

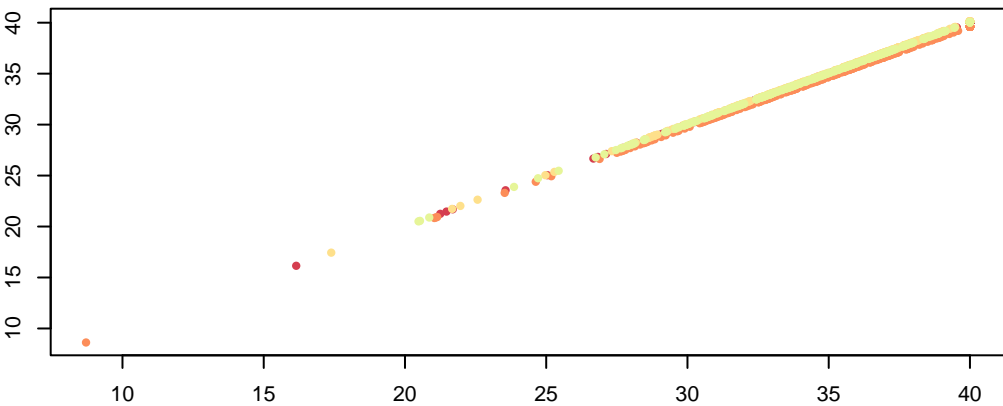

**p1 – raw vs. IPC normalization**

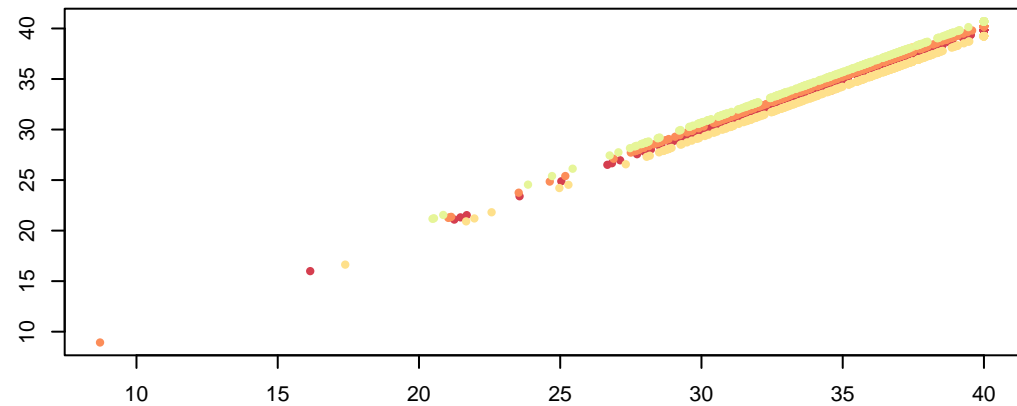

**p1 Comparison of methods for i1**

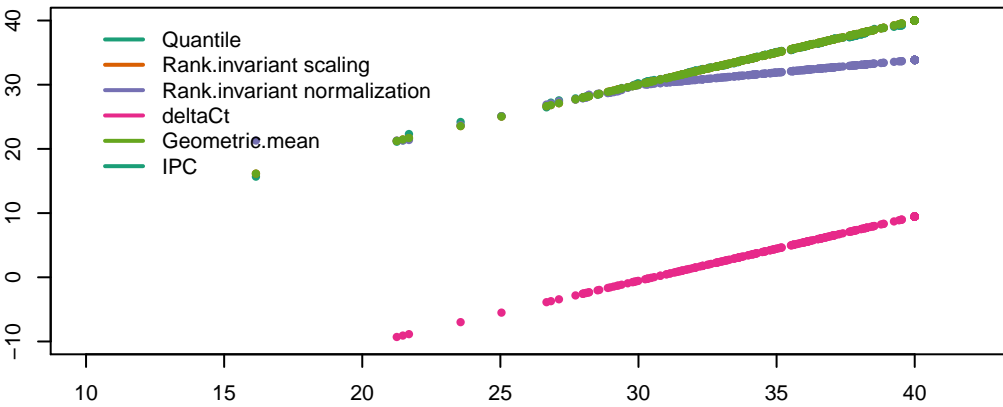

**p1 Comparison of methods for i2**

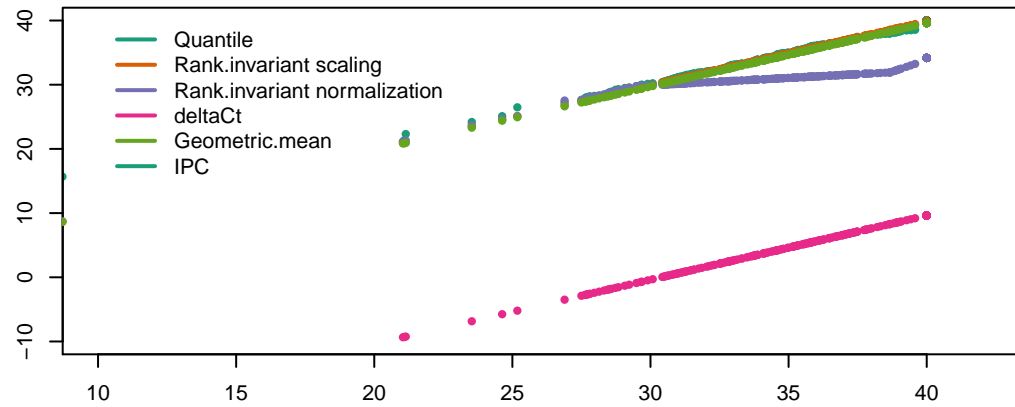

**p1 Comparison of methods for n1**

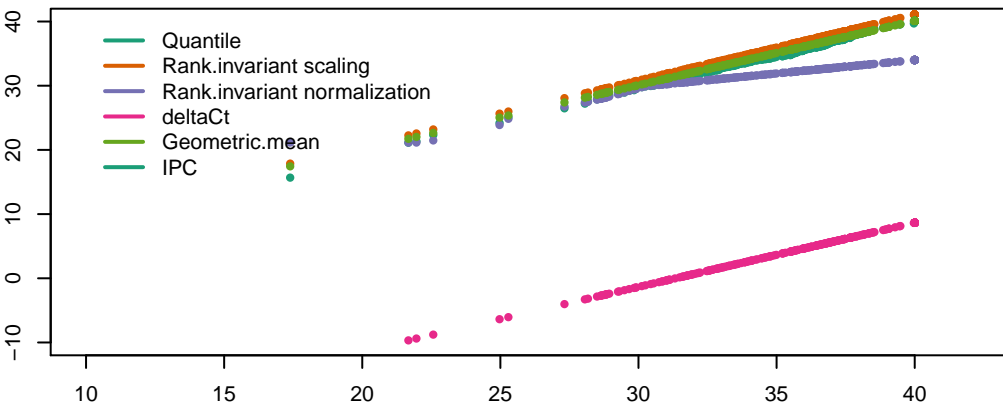

**p1 Comparison of methods for n2**

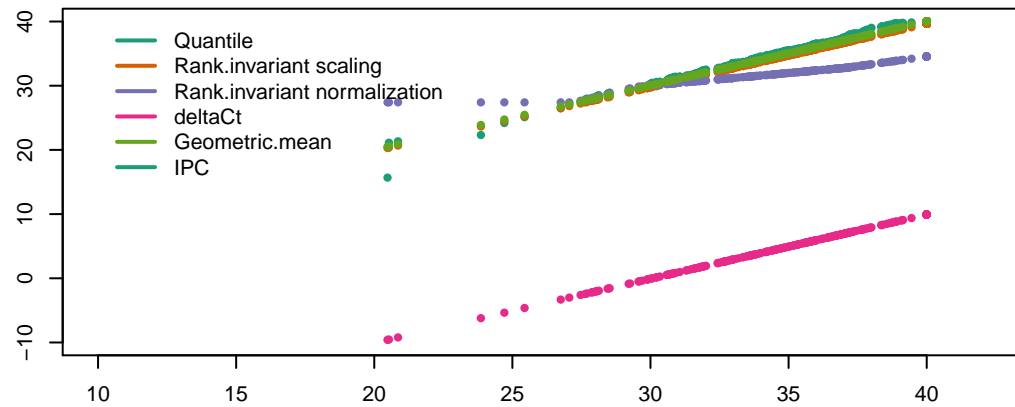

**p1 – raw vs. quantile normalization**

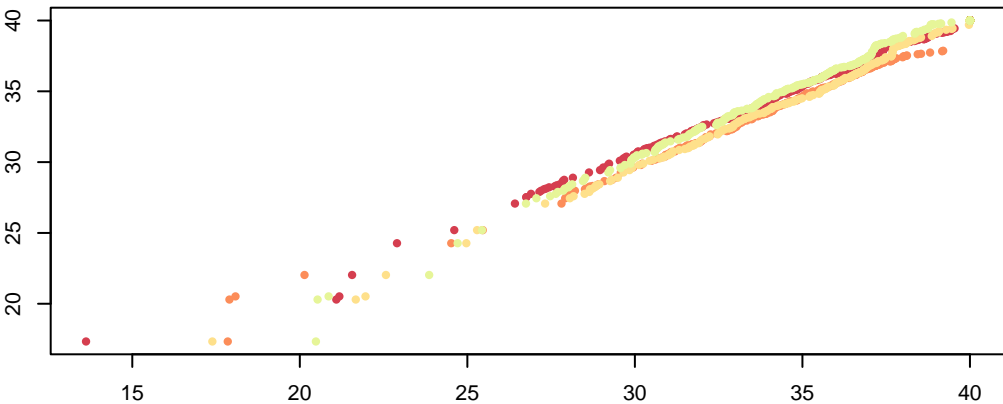

**p1 – raw vs. rank invariant scaling**

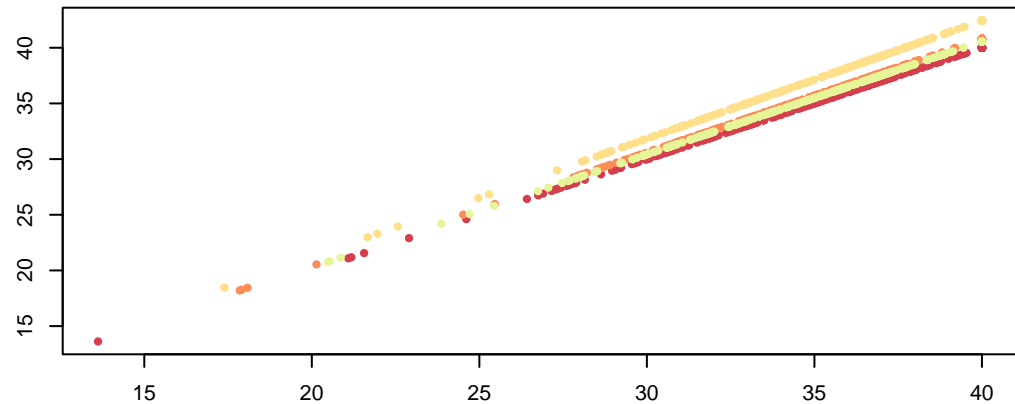

**p1 – raw vs. rank invariant normalization**

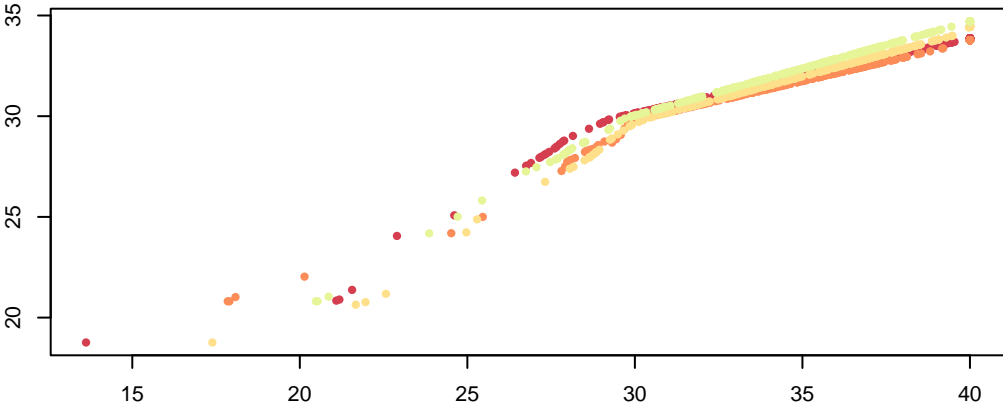

**p1 – raw vs. deltaCt normalization**

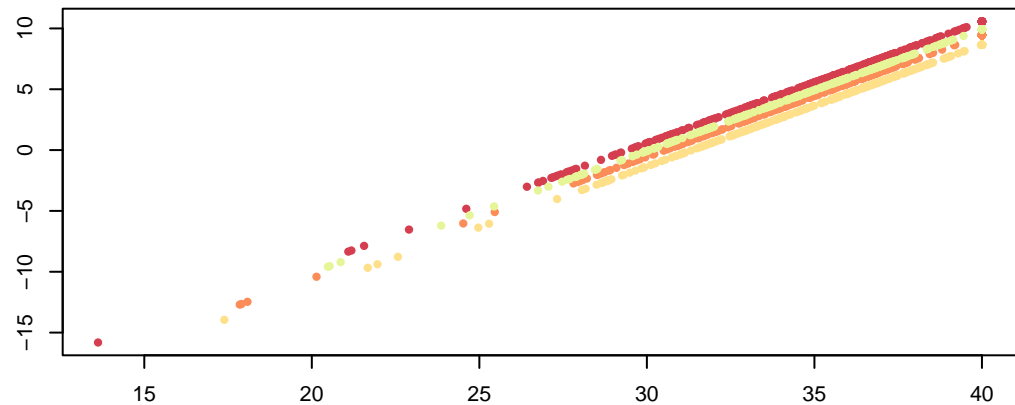

**p1 – raw vs. geometric mean normalization**

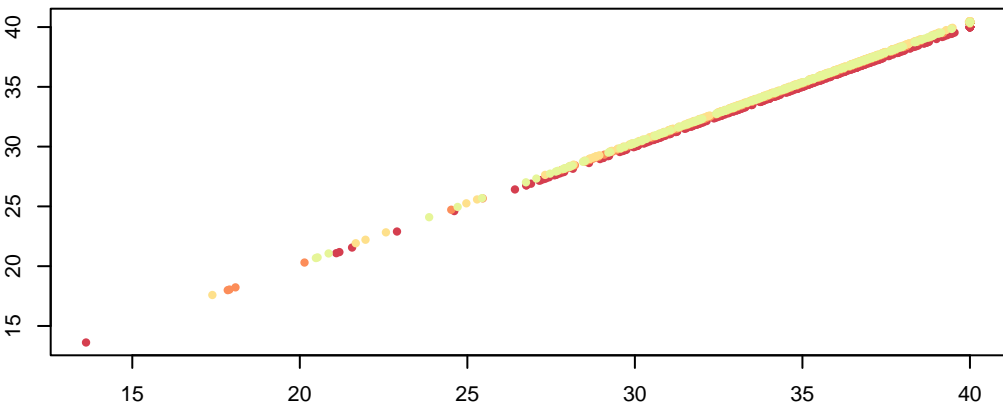

**p1 – raw vs. IPC normalization**

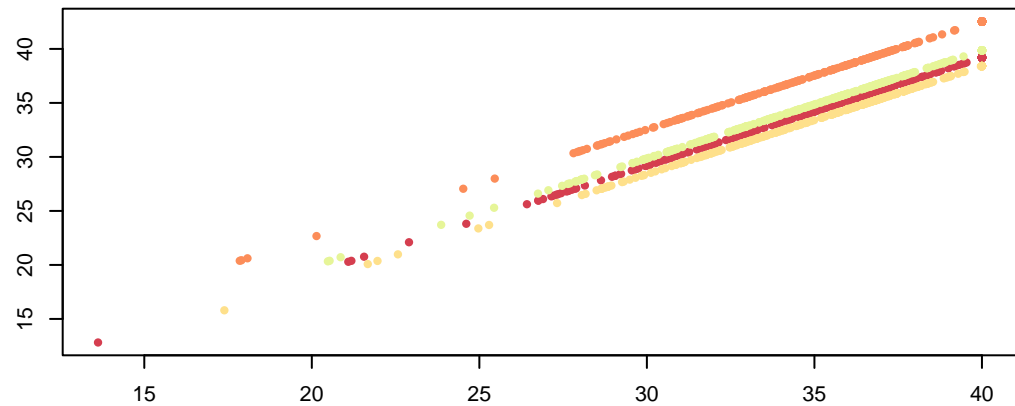

**p1 Comparison of methods for e1**

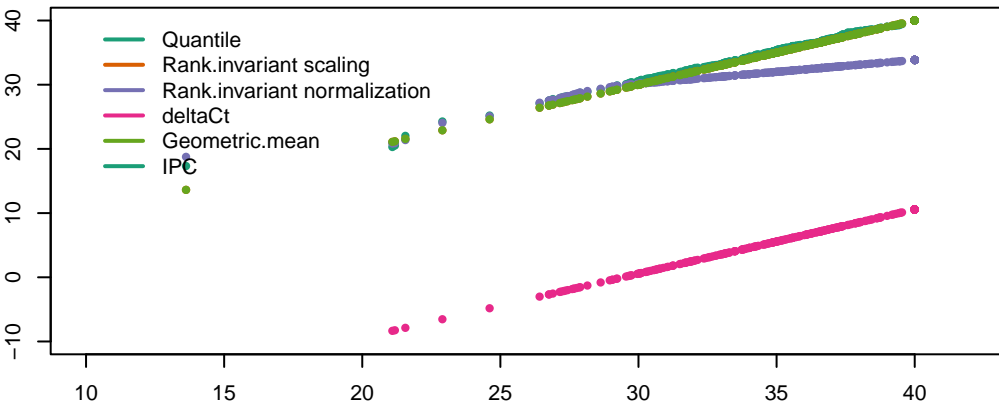

**p1 Comparison of methods for e2**

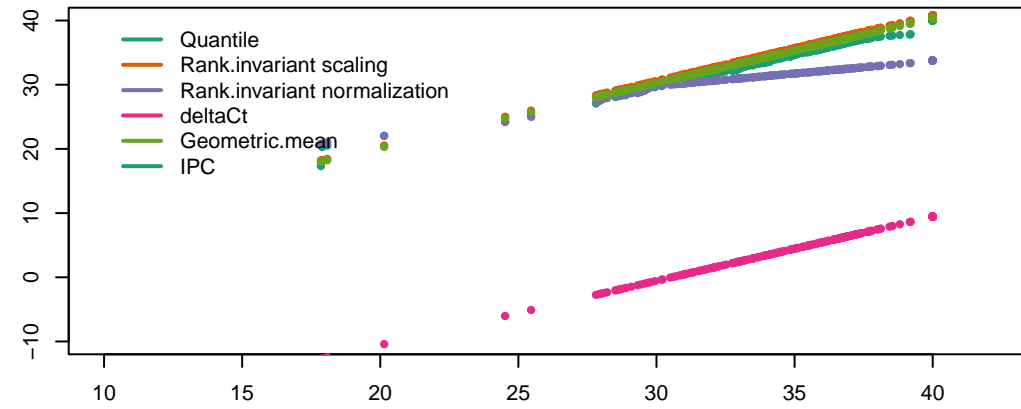

**p1 Comparison of methods for n1**

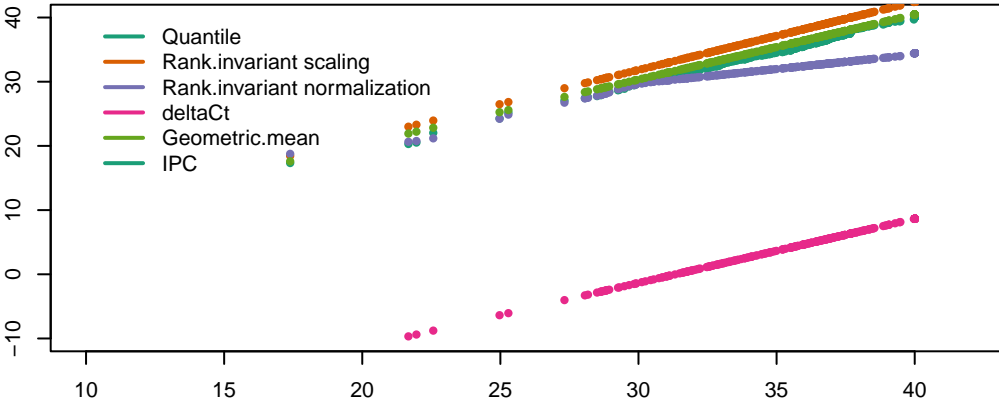

**p1 Comparison of methods for n2**

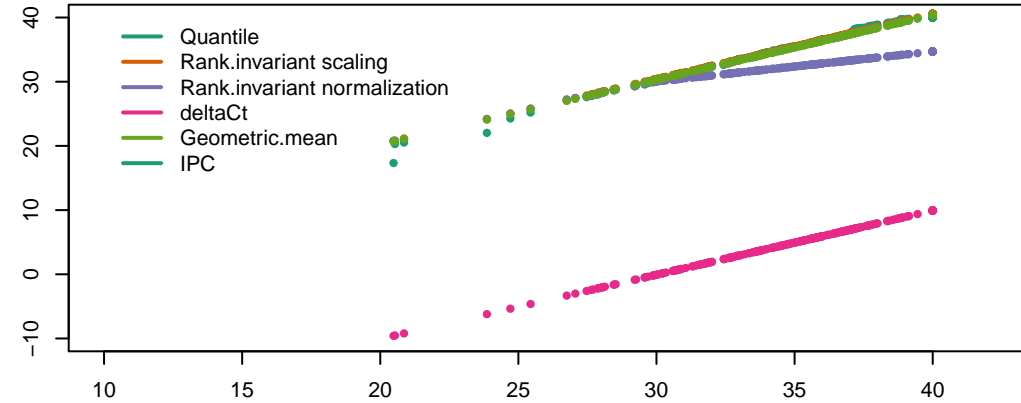

Supplement: pone.0194530.s002.pdf [file pone.0194530.s002.pdf]
