# Supplementary material for: MicroRNA expression in serum samples of sulfur mustard veterans as a diagnostic gateway to improve care
Source: PubMed Central journal article supplement (PMC5864010; doi:10.1371/journal.pone.0194530), 2018-03-22

**S4 Fig. miR-143-3p over expression.**

The graph shows the over expression of miR-143-3p after transfection (fold change of 5.3, p value 0.008 between mock and effect) normalized to the mean of the mock samples. n indicates the number of samples behind the shown mean values. The standard deviation is given by the top indicators. The y axis denotes the fold change.

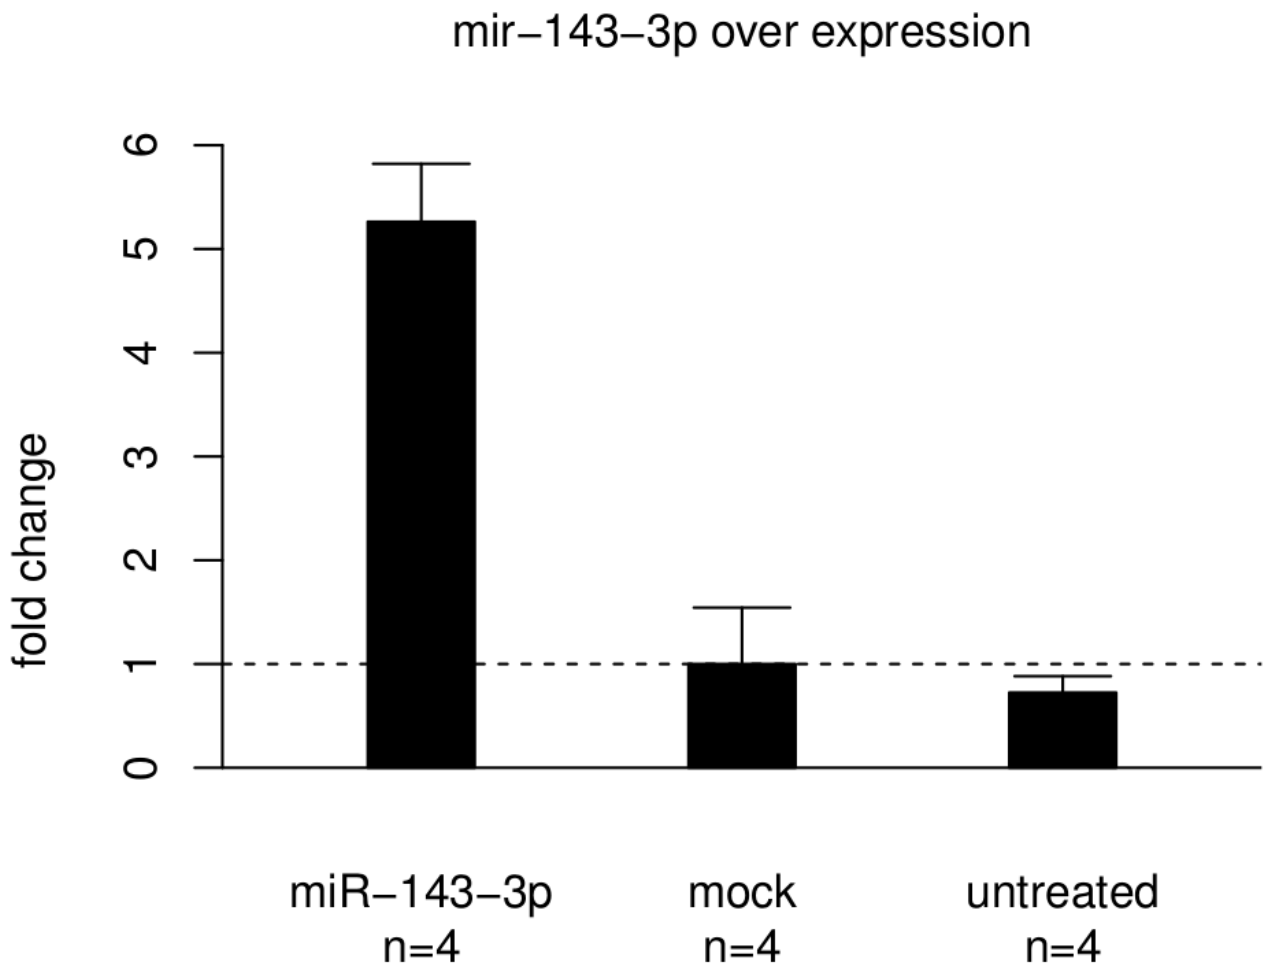

Supplement: pone.0194530.s004.pdf [file pone.0194530.s004.pdf]
